# Supplementary material for: The Bacterial Microbiome of the Tomato Fruit Is Highly Dependent on the Cultivation Approach and Correlates With Flavor Chemistry
Source: Front Plant Sci. 2021 Dec 24;12:775722. doi: 10.3389/fpls.2021.775722 (PMC8740158; doi:10.3389/fpls.2021.775722)
Supplement: Supplementary file 6 [file Data_Sheet_1.xlsx]

## Sheet: Tabelle1
Taste scores (Scores are average values of the points provided by a taster panel consisting of trained 12 people at the Viennese LGV Sonnengemüse cooperative)
	Score Aroma	Qual. Aroma	Score Consistency	Qual. Consistency	Sugar/Acid ratio	Qual. S/A
Ardiles	3.1	slightly aromatic	3	firm to the bite	4.2	balanced
Campari	3.1	slightly aromatic	4.1	firm	4.1	balanced
Cappricia	2.5	watery and slightly aromatic	2.6	soft, mealy	4.2	balanced
Savantas	2.5	watery and slightly aromatic	2.4	soft, mealy	3.8	balanced
Solarino	3.6	aromatic	3.8	firm	5	slightly sweet
